# Supplementary material
Source: publisher figshare collection journal article supplement (https://springernature.figshare.com/ndownloader/files/12979277)
Supplement: Supplementary file [file 12979277]

| Table S2 ANOVA of effects of residence time (RT) and anaerobic/aerobic sampling method on CH <sub>4</sub> content. |       |          |                      |         |         |
|--------------------------------------------------------------------------------------------------------------------|-------|----------|----------------------|---------|---------|
| Factor information                                                                                                 |       |          |                      |         |         |
| Factor                                                                                                             | Type  | Levels   | Values               |         |         |
| RT (days)                                                                                                          | Fixed | 4        | 3.3, 5.0, 10.0, 20.0 |         |         |
| Sampling method                                                                                                    | Fixed | 2        | Aerobic, Anaerobic   |         |         |
| Analysis of variance                                                                                               |       |          |                      |         |         |
| Source                                                                                                             | DF    | Adj SS   | Adj MS               | F-Value | P-Value |
| RT (days)                                                                                                          | 3     | 0.018570 | 0.006190             | 65.35   | <0.001  |
| Sampling method                                                                                                    | 1     | 0.000847 | 0.000847             | 8.94    | 0.004   |
| RT*Sampling method                                                                                                 | 3     | 0.000820 | 0.000273             | 2.89    | 0.041   |
| Error                                                                                                              | 82    | 0.007767 | 0.000095             |         |         |
| Total                                                                                                              | 89    | 0.029394 |                      |         |         |

A two-way ANOVA was conducted with Minitab 17 Statistical Software (State College, PA: Minitab, Inc. ([www.minitab.com](http://www.minitab.com))) on a sample of 90 data points to investigate the effect of residence time (RT) and sampling method on CH<sub>4</sub> content of biogas. Analysis showed that both RT and sampling method had significant ( $p < 0.001$ ,  $p = 0.004$ ) effect on CH<sub>4</sub> content. The interaction between the effects of RT and sampling method on CH<sub>4</sub> content was also significant ( $p = 0.041$ ).
